# Supplementary material for: A spectrum of clinically-identified cysteine mutations in fibulin-3 (EFEMP1) highlight its disulfide bonding complexity and potential to induce stress response activation
Source: PubMed Central journal article supplement — bioRxiv. 2024 Jul 23:2024.07.22.604634. Preprint. [Version 1] doi: 10.1101/2024.07.22.604634 (PMC11291045; doi:10.1101/2024.07.22.604634), 2024-07-23
Supplement: media-1.pdf [file media-1.pdf]

A

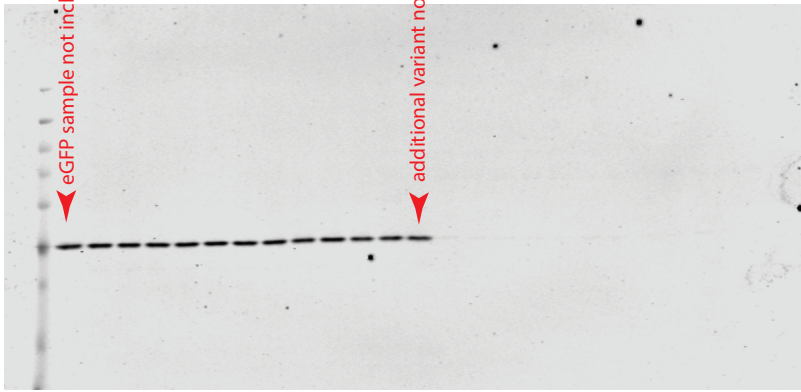

full blot used for GAPDH in Fig. 1B

B

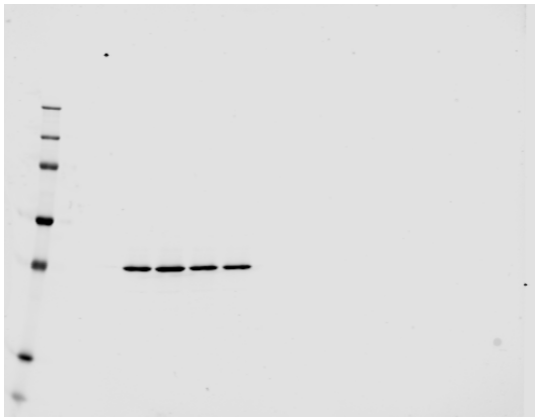

full blot used for GAPDH in Fig. 2A

C

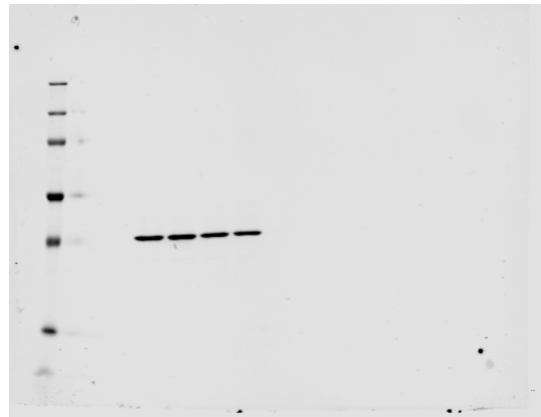

full blot used for GAPDH in Fig. 2B

D

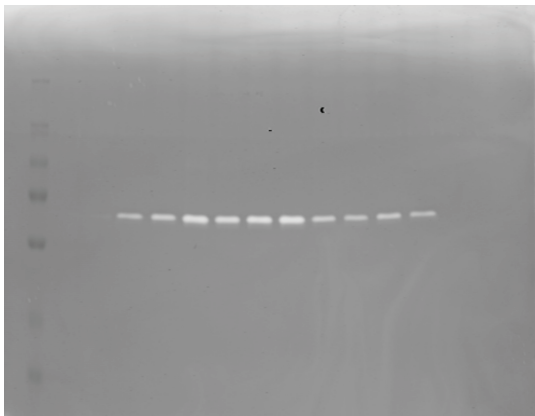

full gel used for zymography in Fig. 2D

E

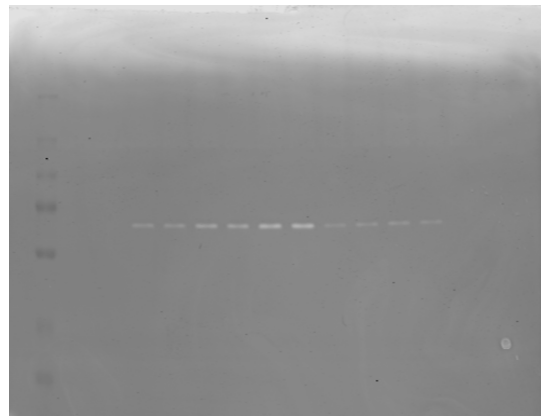

full gel used for zymography in Fig. 2E
