# Supplementary material for: A spectrum of clinically-identified cysteine mutations in fibulin-3 (EFEMP1) highlight its disulfide bonding complexity and potential to induce stress response activation
Source: PubMed Central journal article supplement — bioRxiv. 2024 Jul 23:2024.07.22.604634. Preprint. [Version 1] doi: 10.1101/2024.07.22.604634 (PMC11291045; doi:10.1101/2024.07.22.604634), 2024-07-23
Supplement: media-2.pdf [file media-2.pdf]

Sup. Table 1

| gnomADID       | Protein Consequence | Transcript Consequence | ClinVar Clinical Significance | ClinVar Variation ID | Allele Count | Allele Frequency |
|----------------|---------------------|------------------------|-------------------------------|----------------------|--------------|------------------|
| 2-55918224-C-T | p.Cys42Tyr          | c.125G>A               |                               |                      | 4            | 2.48E-06         |
| 2-55881684-A-G | p.Cys190Arg         | c.568T>C               | Uncertain significance        | 2006112              | 6            | 3.72E-06         |
| 2-55877854-A-G | p.Cys218Arg         | c.652T>C               |                               |                      | 1            | 6.20E-07         |
| 2-55877751-C-A | p.Cys252Phe         | c.755G>T               |                               |                      | 1            | 6.20E-07         |
| 2-55871030-C-G | p.Cys365Ser         | c.1094G>C              |                               |                      | 1            | 6.20E-07         |
| 2-55871052-G-A | p.Arg358Cys         | c.1072C>T              | Uncertain significance        | 2259874              | 12           | 7.44E-06         |
| 2-55871018-T-C | p.Tyr369Cys         | c.1106A>G              |                               |                      | 2            | 1.24E-06         |
|                |                     |                        |                               |                      |              |                  |
